# Supplementary material for: Effects of Climate Change and Urbanization on Bridge Flood Vulnerability: A Regional Assessment for Harris County, Texas
Source: Atypon-hosted journal article supplement (doi:10.1061/nhrefo.nheng-1720), 2023-05-13
Supplement: supplemental_materials_nhrefo.nheng-1720_pervaiz.pdf [file supplemental_materials_nhrefo.nheng-1720_pervaiz.pdf]

## SUPPLEMENTAL MATERIALS

*ASCE Natural Hazards Review*

# Effects of Climate Change and Urbanization on Bridge Flood Vulnerability: A Regional Assessment for Harris County, Texas

Fahad Pervaiz and Michelle A. Hummel

**DOI:** 10.1061/NHREFO.NHENG-1720

© ASCE 2023

[www.ascelibrary.org](http://www.ascelibrary.org)

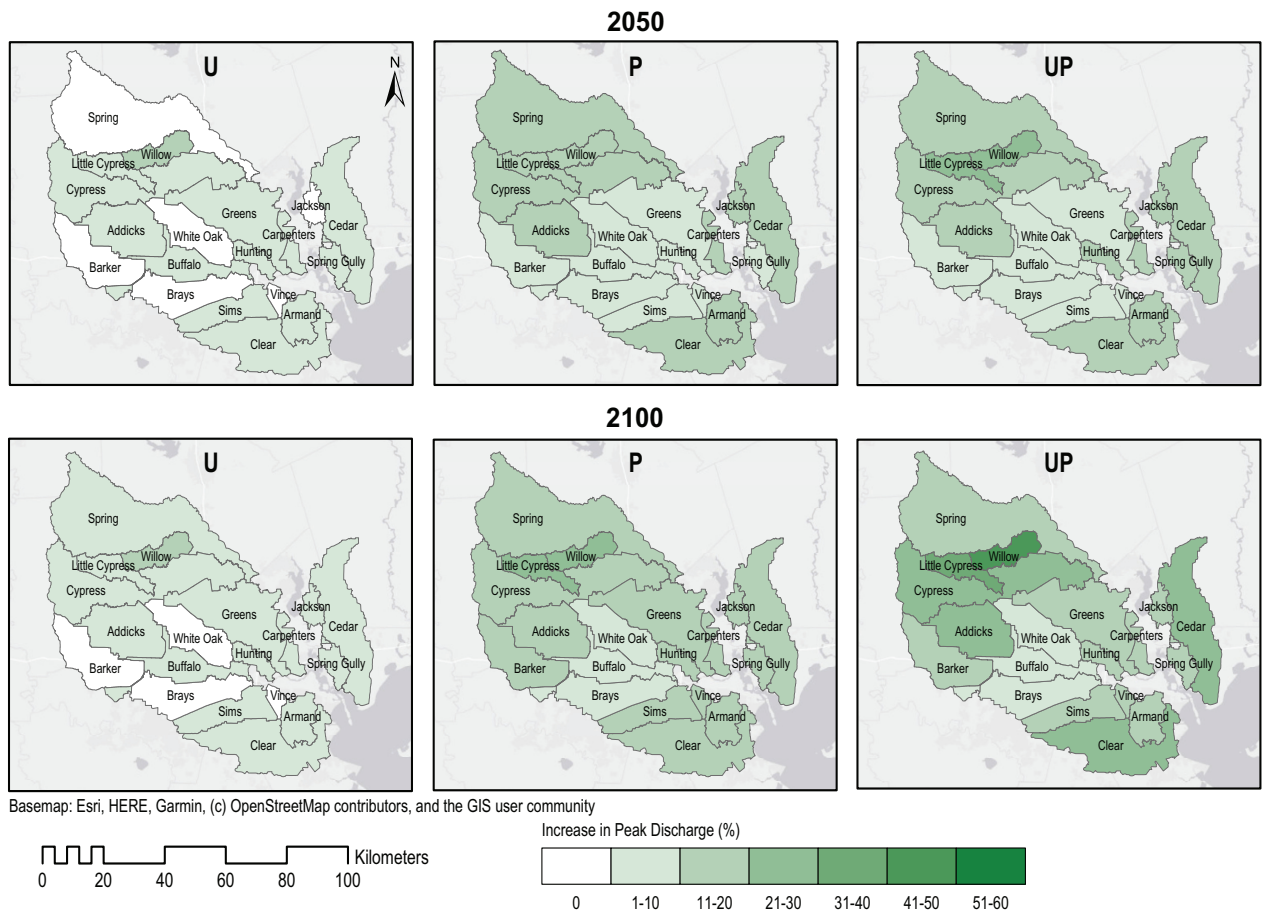

**Fig. S1.** Increase in peak discharge for 2% AEP event.

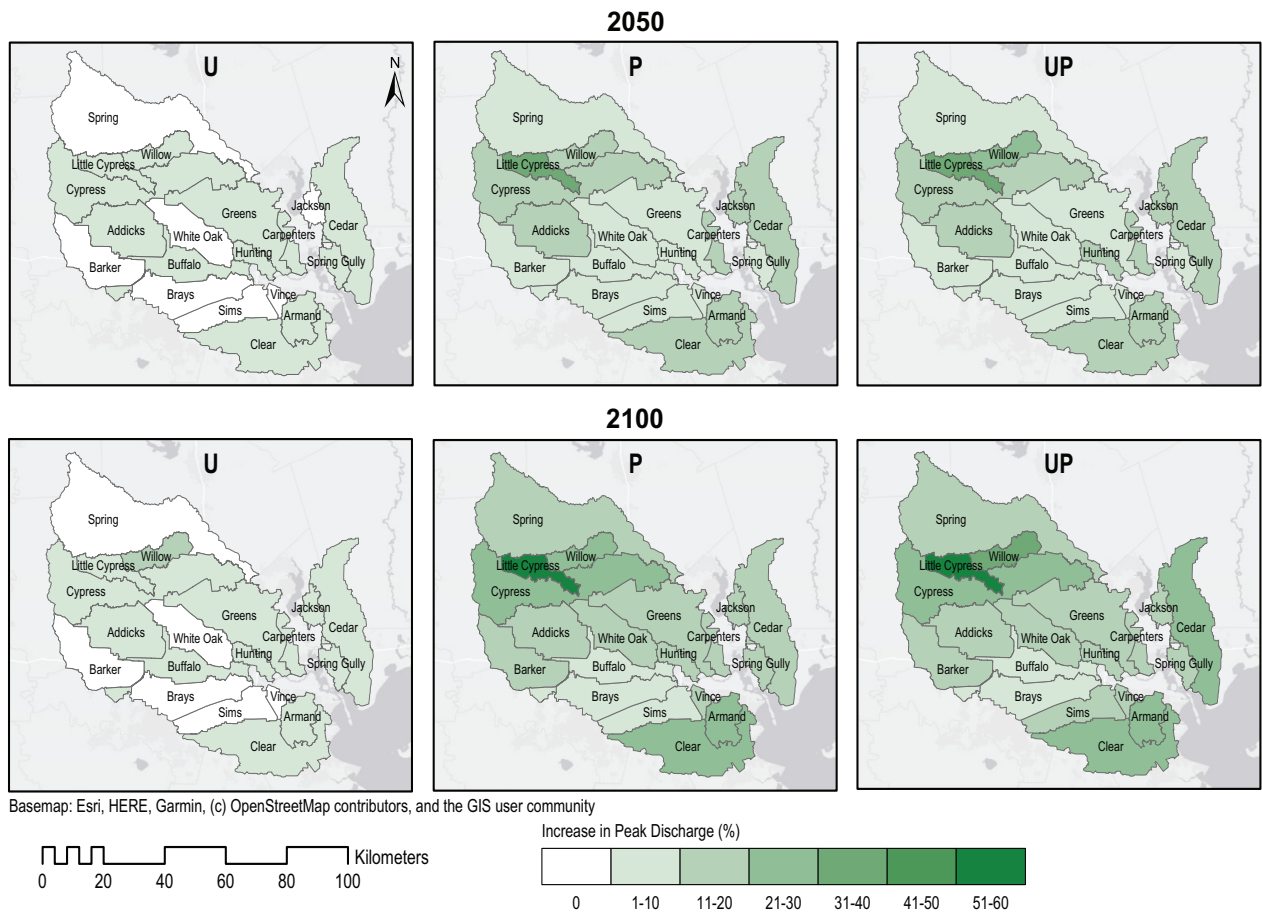

**Fig. S2.** Increase in peak discharge for 0.2% AEP event.

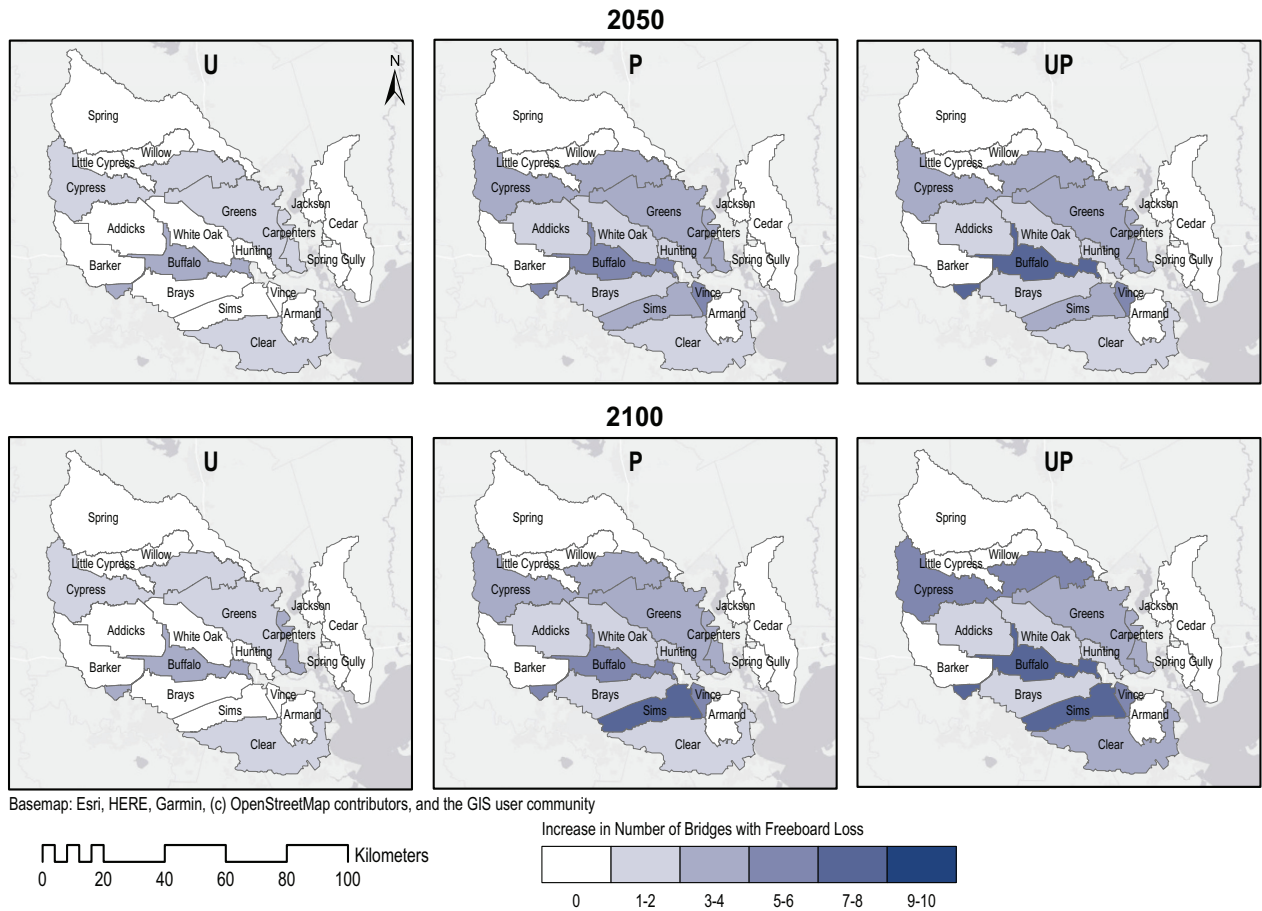

**Fig. S3.** Increase in number of bridges with freeboard loss for 2% AEP event.

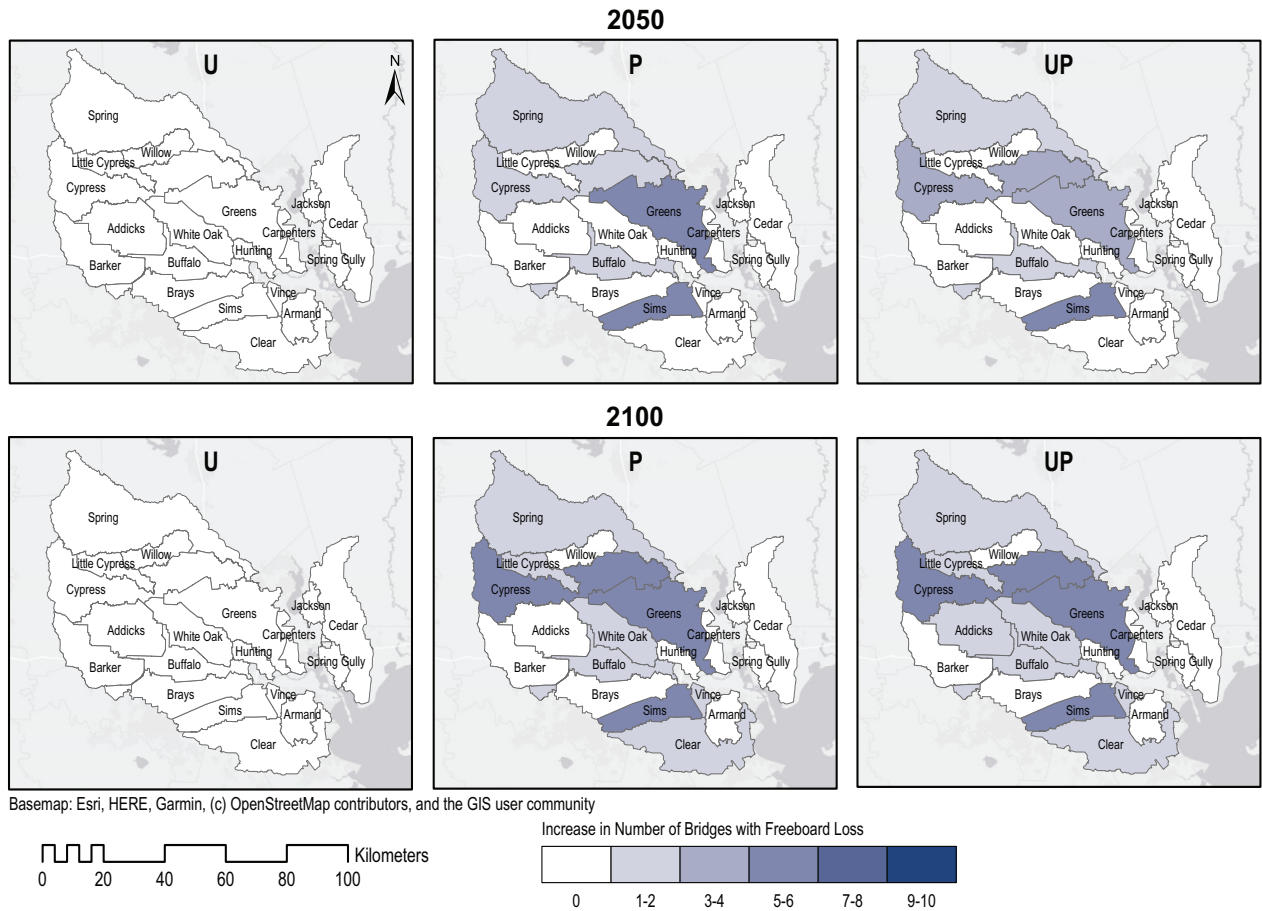

**Fig. S4.** Increase in number of bridges with freeboard loss for 0.2% AEP event.

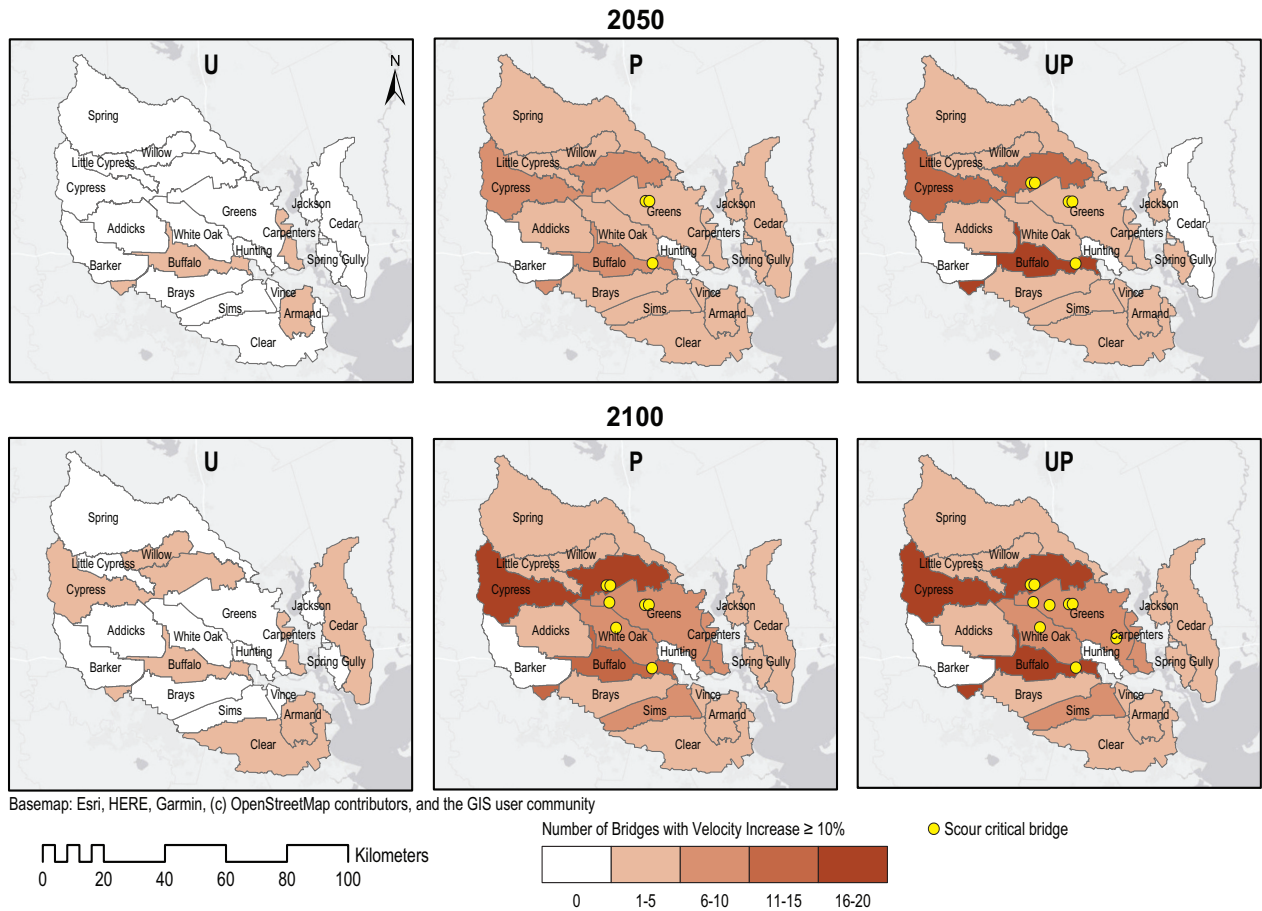

**Fig. S5.** Number of bridges with velocity increase  $\geq 10\%$  for 2% AEP event.

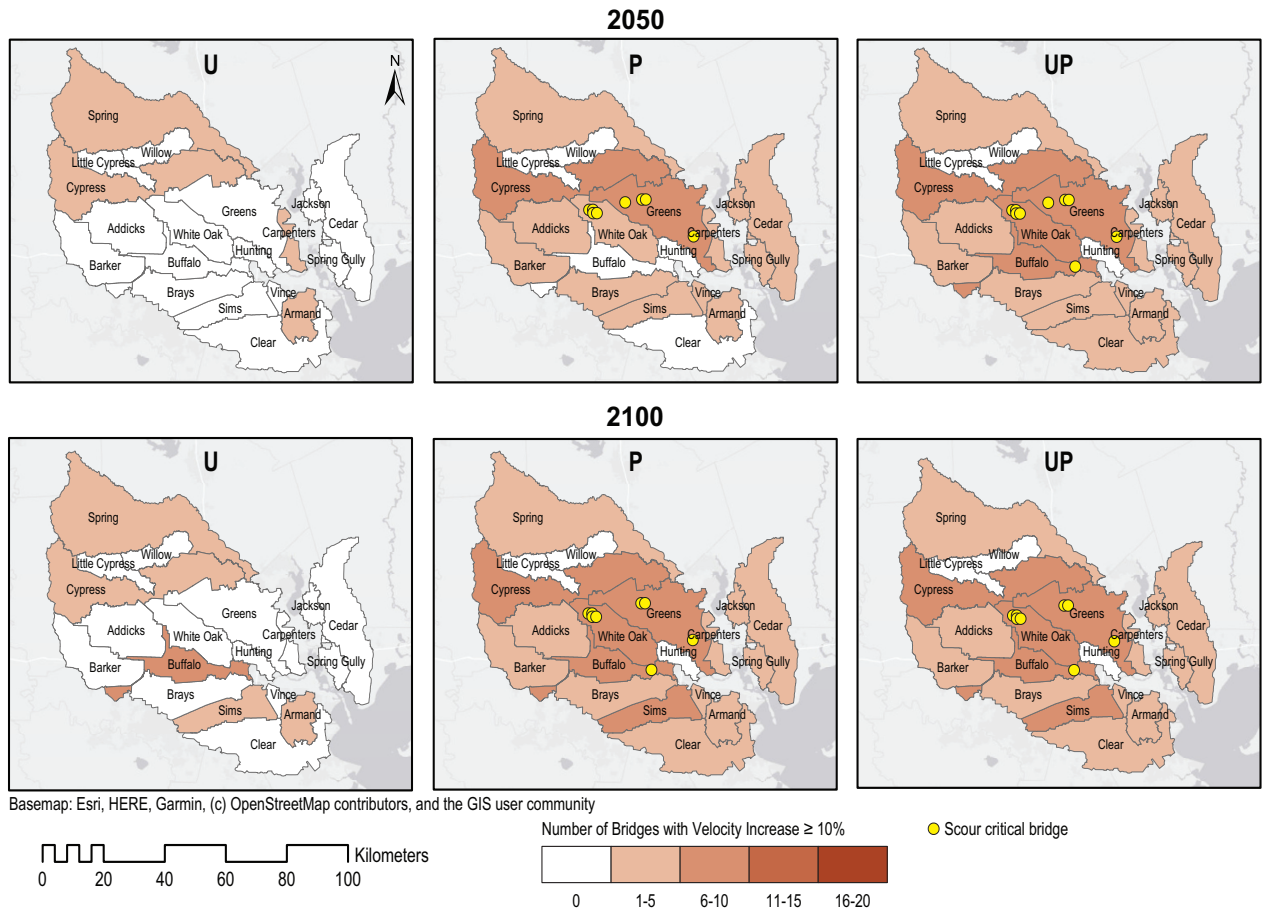

**Fig. S6.** Number of bridges with velocity increase  $\geq 10\%$  for 0.2% AEP event.
